# Supplementary material for: Who Lives in the Hot Heart of the Cold Sea? A New Species of Provanna (Caenogastropoda: Provannidae) from the Hydrothermal Zone of Piip Volcano, Northwestern Pacific
Source: MDPI journal article supplement (doi:10.3390/d15040581), 2023-04-21
Supplement: s1 [file s1]

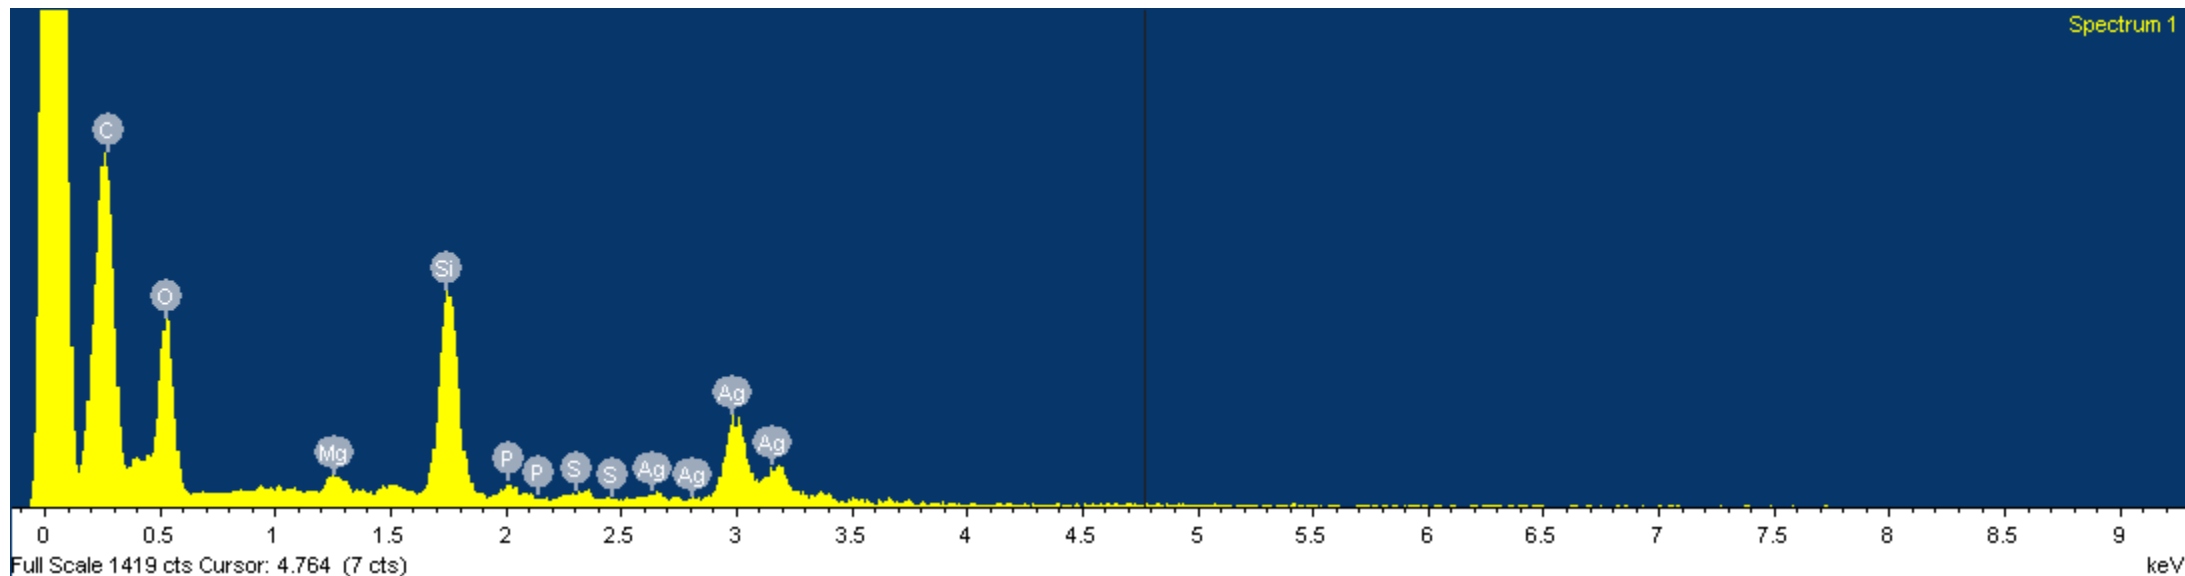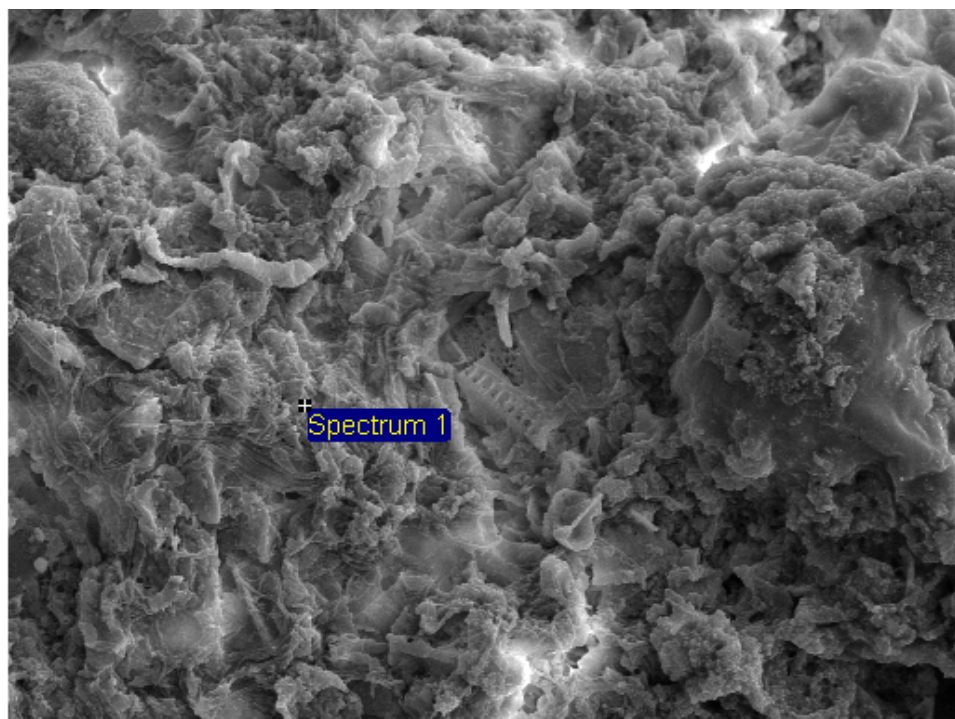

20µm

Electron Image 1

Sample: Sample 401

Type: Default

ID:

Spectrum processing :

No peaks omitted

Processing option : All elements analyzed (Normalised)

Number of iterations = 3

Standard :

C CaCO<sub>3</sub> 1-июн-1999 12:00 AMO SiO<sub>2</sub> 1-июн-1999 12:00 AM

Mg MgO 1-июн-1999 12:00 AM

Si SiO2 1-июн-1999 12:00 AM

P GaP 1-июн-1999 12:00 AM

S FeS2 1-июн-1999 12:00 AM

Ag Ag 1-июн-1999 12:00 AM

| Element | Weight% | Atomic% |
|---------|---------|---------|
| C K     | 35.13   | 55.45   |
| O K     | 26.26   | 31.12   |
| Mg K    | 0.78    | 0.61    |
| Si K    | 11.16   | 7.54    |
| P K     | 0.84    | 0.52    |
| S K     | 0.56    | 0.33    |
| Ag L    | 25.26   | 4.44    |
| Totals  | 100.00  |         |

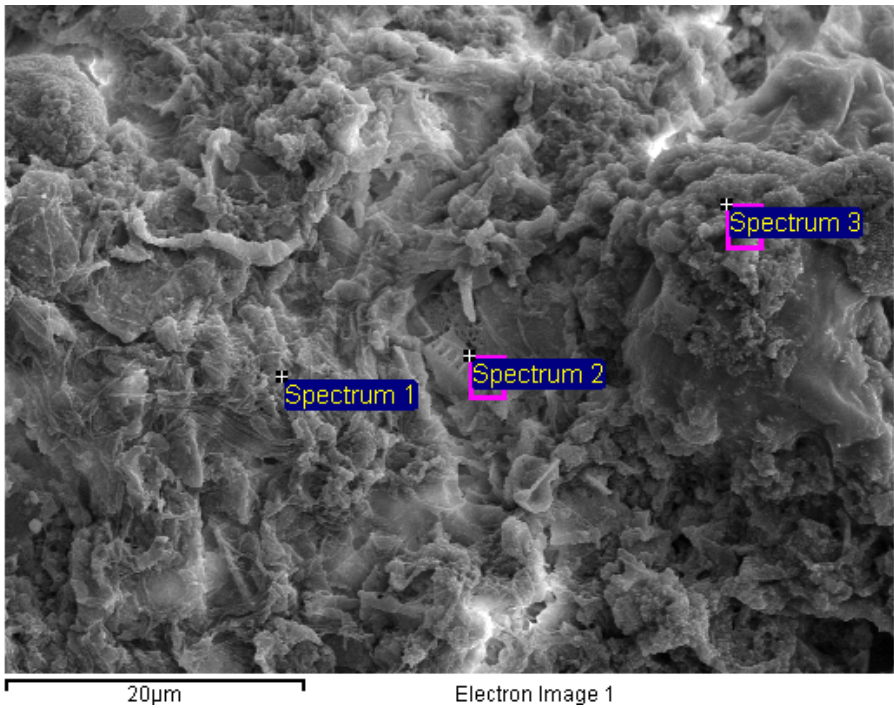

Sample: Sample 401

Type: Default

Project: Project 1

Owner: INCA Operator

Site: Site of Interest 1

Comment:

Processing option : All elements analysed (Normalised)

| Spectrum   | In stats. | C     | O     | Mg   | Al   | Si    | P    | S    | Ag   |
|------------|-----------|-------|-------|------|------|-------|------|------|------|
| Spectrum 1 | Yes       | 55.45 | 31.12 | 0.61 |      | 7.54  | 0.52 | 0.33 | 4.44 |
| Spectrum 2 | Yes       | 39.67 | 38.56 | 0.43 | 0.53 | 14.43 |      |      | 6.38 |
| Spectrum 3 | Yes       | 70.56 | 21.87 | 0.48 |      |       | 0.44 |      | 6.64 |
| Max.       |           | 70.56 | 38.56 | 0.61 | 0.53 | 14.43 | 0.52 | 0.33 | 6.64 |
| Min.       |           | 39.67 | 21.87 | 0.43 | 0.53 | 7.54  | 0.44 | 0.33 | 4.44 |



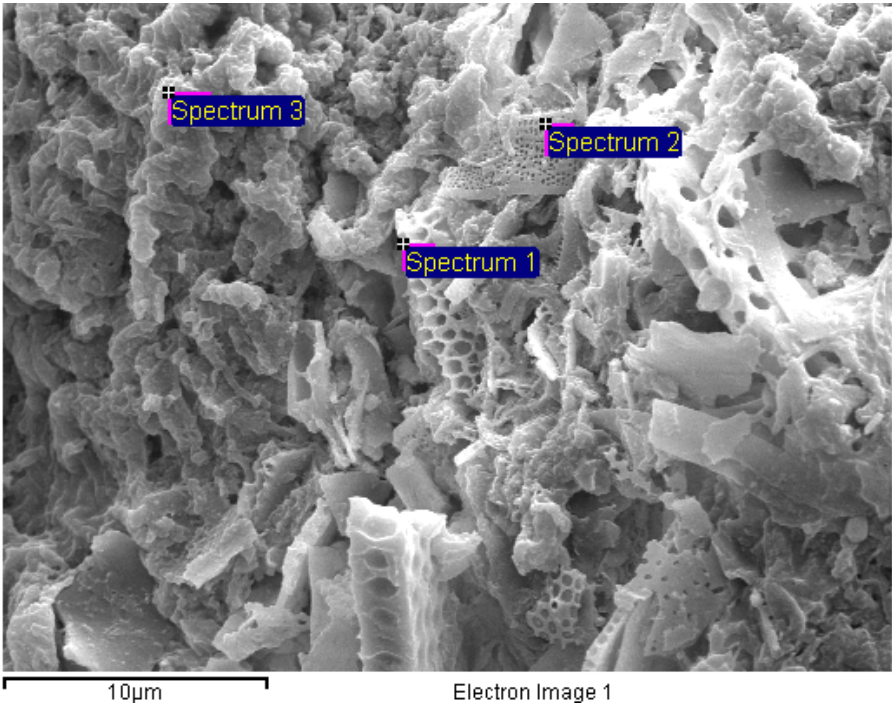

Sample: Sample 401

Type: Default

Project: Project 1

Owner: INCA Operator

Site: Site of Interest 2

Comment:

Processing option : All elements analysed (Normalised)

| Spectrum   | In stats. | O     | Mg   | Al   | Si    | P    | S    | Cu   | Ag    |
|------------|-----------|-------|------|------|-------|------|------|------|-------|
| Spectrum 1 | Yes       | 61.83 | 0.90 |      | 24.04 |      |      |      | 13.23 |
| Spectrum 2 | Yes       | 68.03 | 1.80 | 1.17 | 14.93 | 0.83 | 1.02 |      | 12.22 |
| Spectrum 3 | Yes       | 68.02 | 2.57 |      |       | 2.03 | 1.29 | 0.00 | 26.09 |
| Max.       |           | 68.03 | 2.57 | 1.17 | 24.04 | 2.03 | 1.29 | 0.00 | 26.09 |
| Min.       |           | 61.83 | 0.90 | 1.17 | 14.93 | 0.83 | 1.02 | 0.00 | 12.22 |
