# Supplementary material for: Who Lives in the Hot Heart of the Cold Sea? A New Species of Provanna (Caenogastropoda: Provannidae) from the Hydrothermal Zone of Piip Volcano, Northwestern Pacific
Source: MDPI journal article supplement (doi:10.3390/d15040581), 2023-04-21

Supplementary figure S1

Maximum likelihood phylogenetic trees based on fragments of COI and 16S genes

The trees were calculated for the paper: "Who lives in the hot heart of the cold sea? A new species of Provanna (Caenogastropoda: Provannidae) from the hydrothermal zone of Piip volcano, NW Pacific" prepared for Diversity

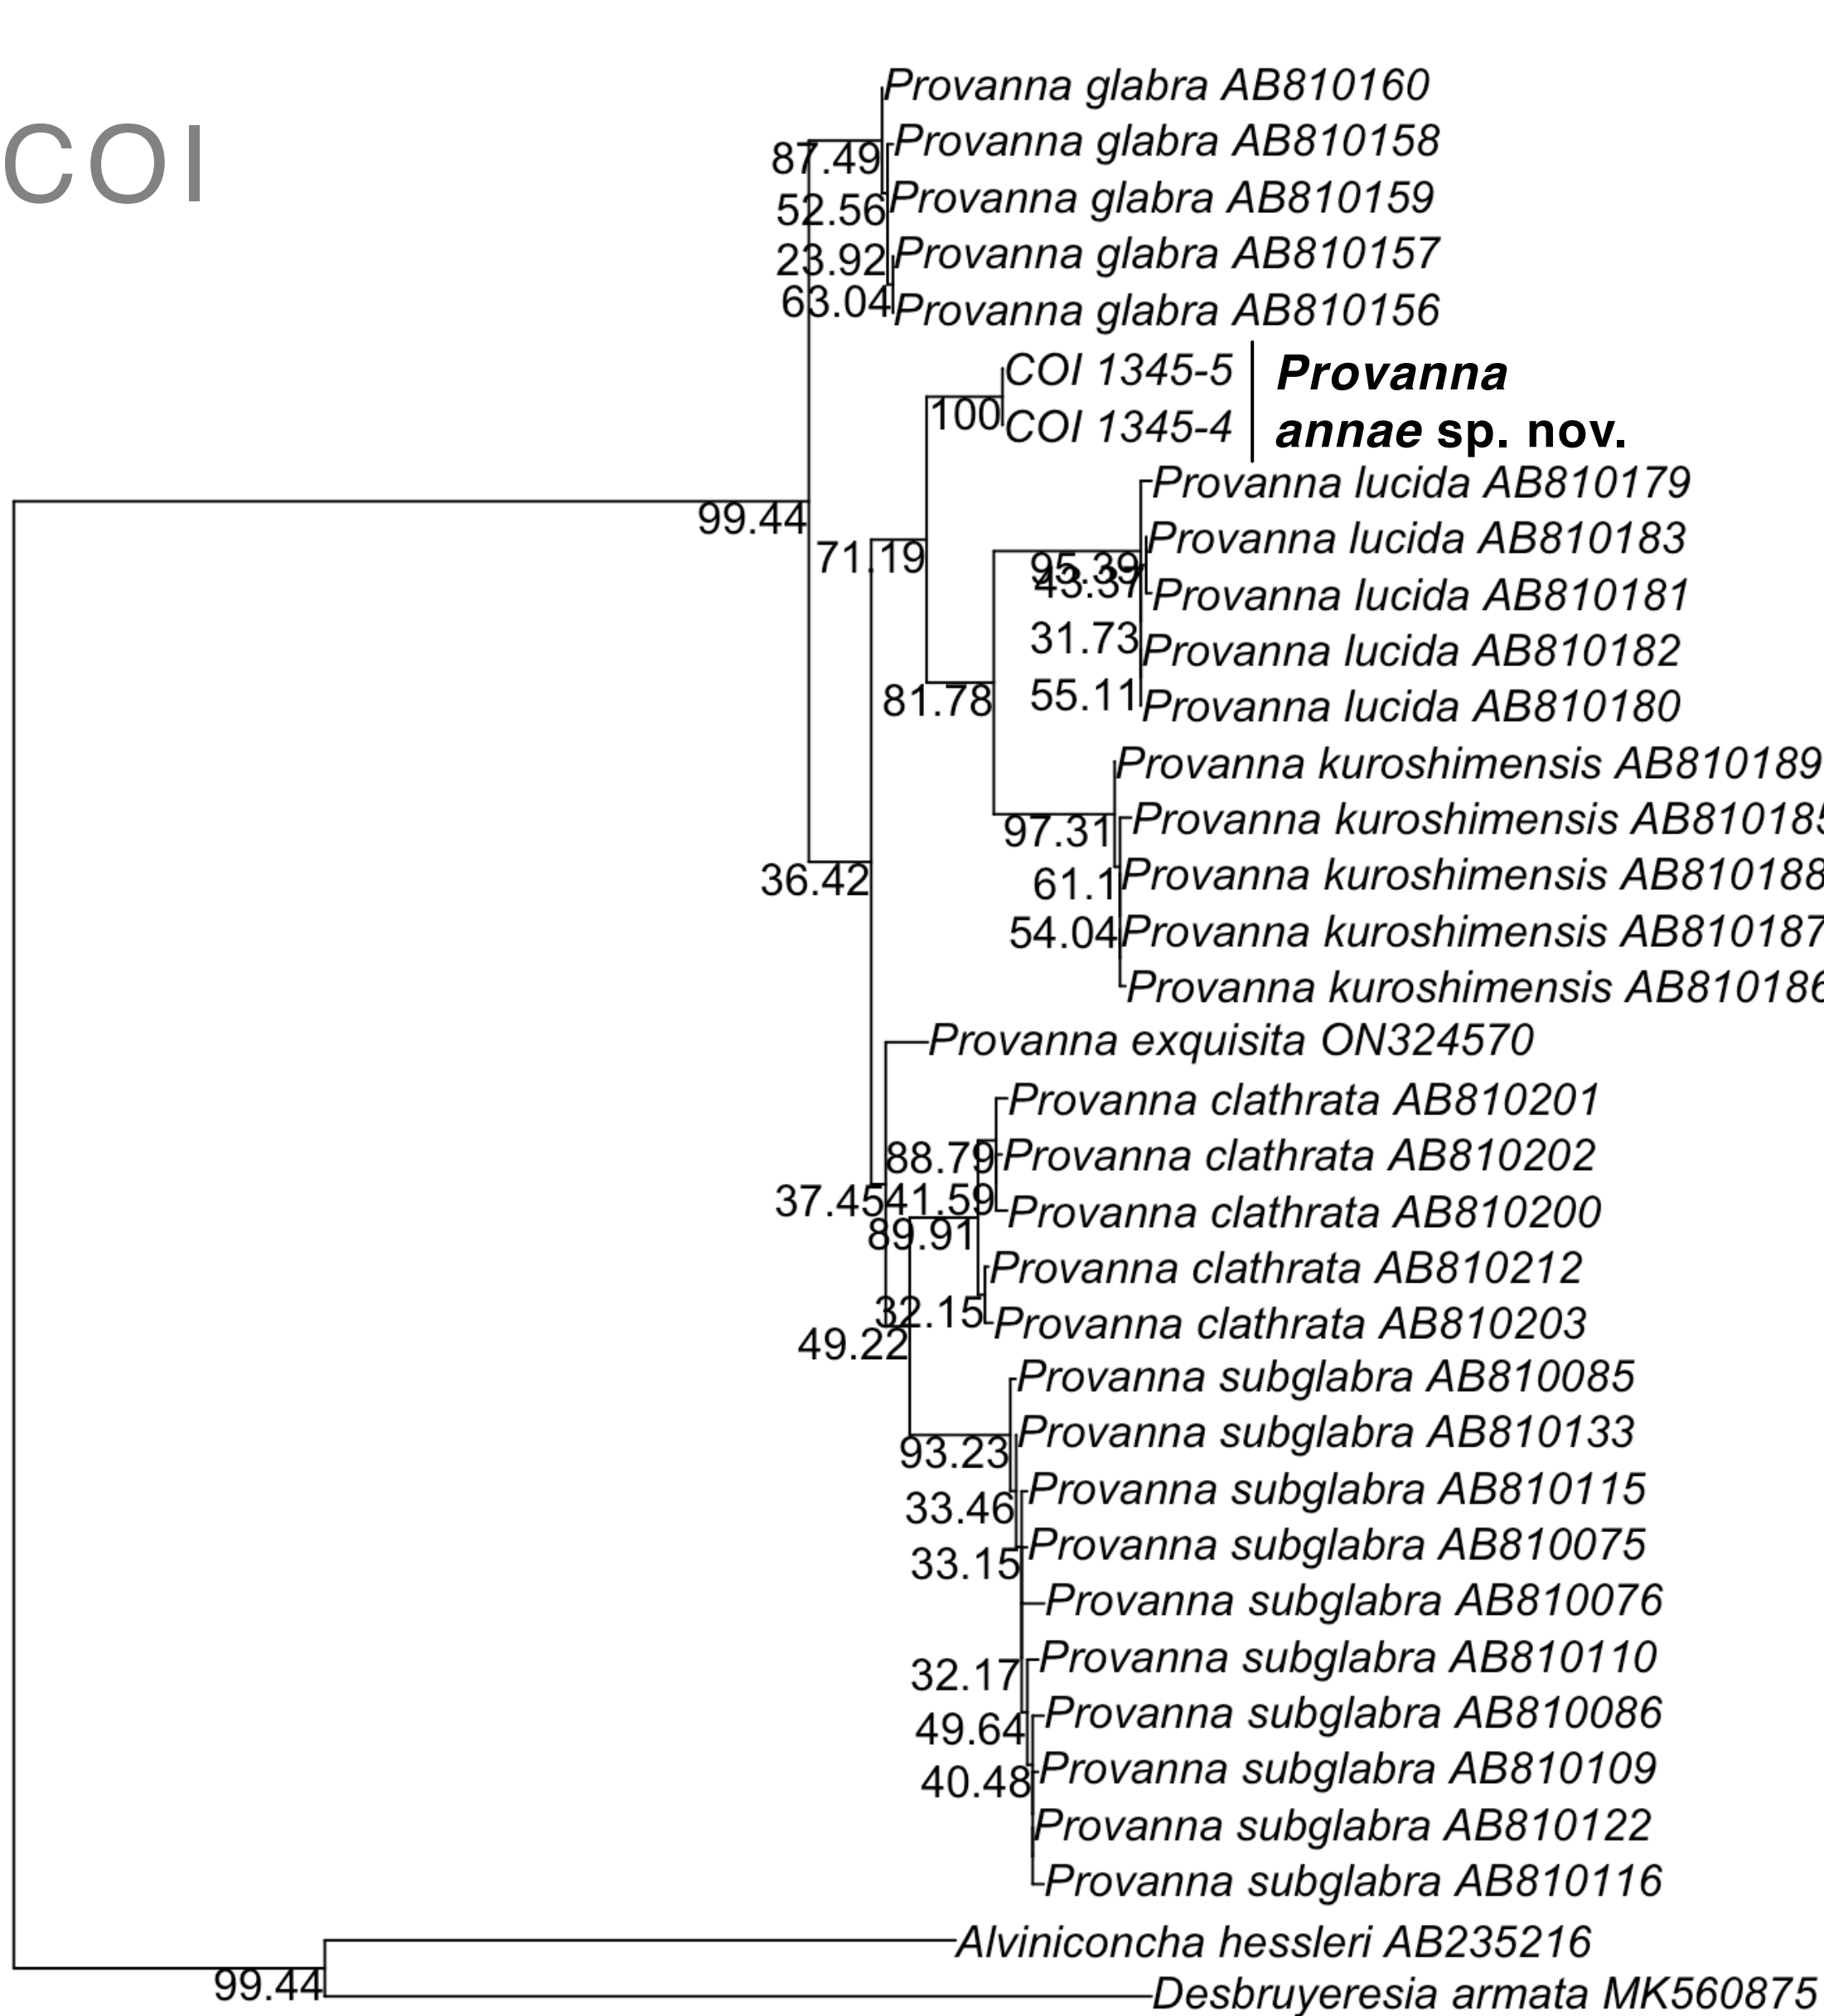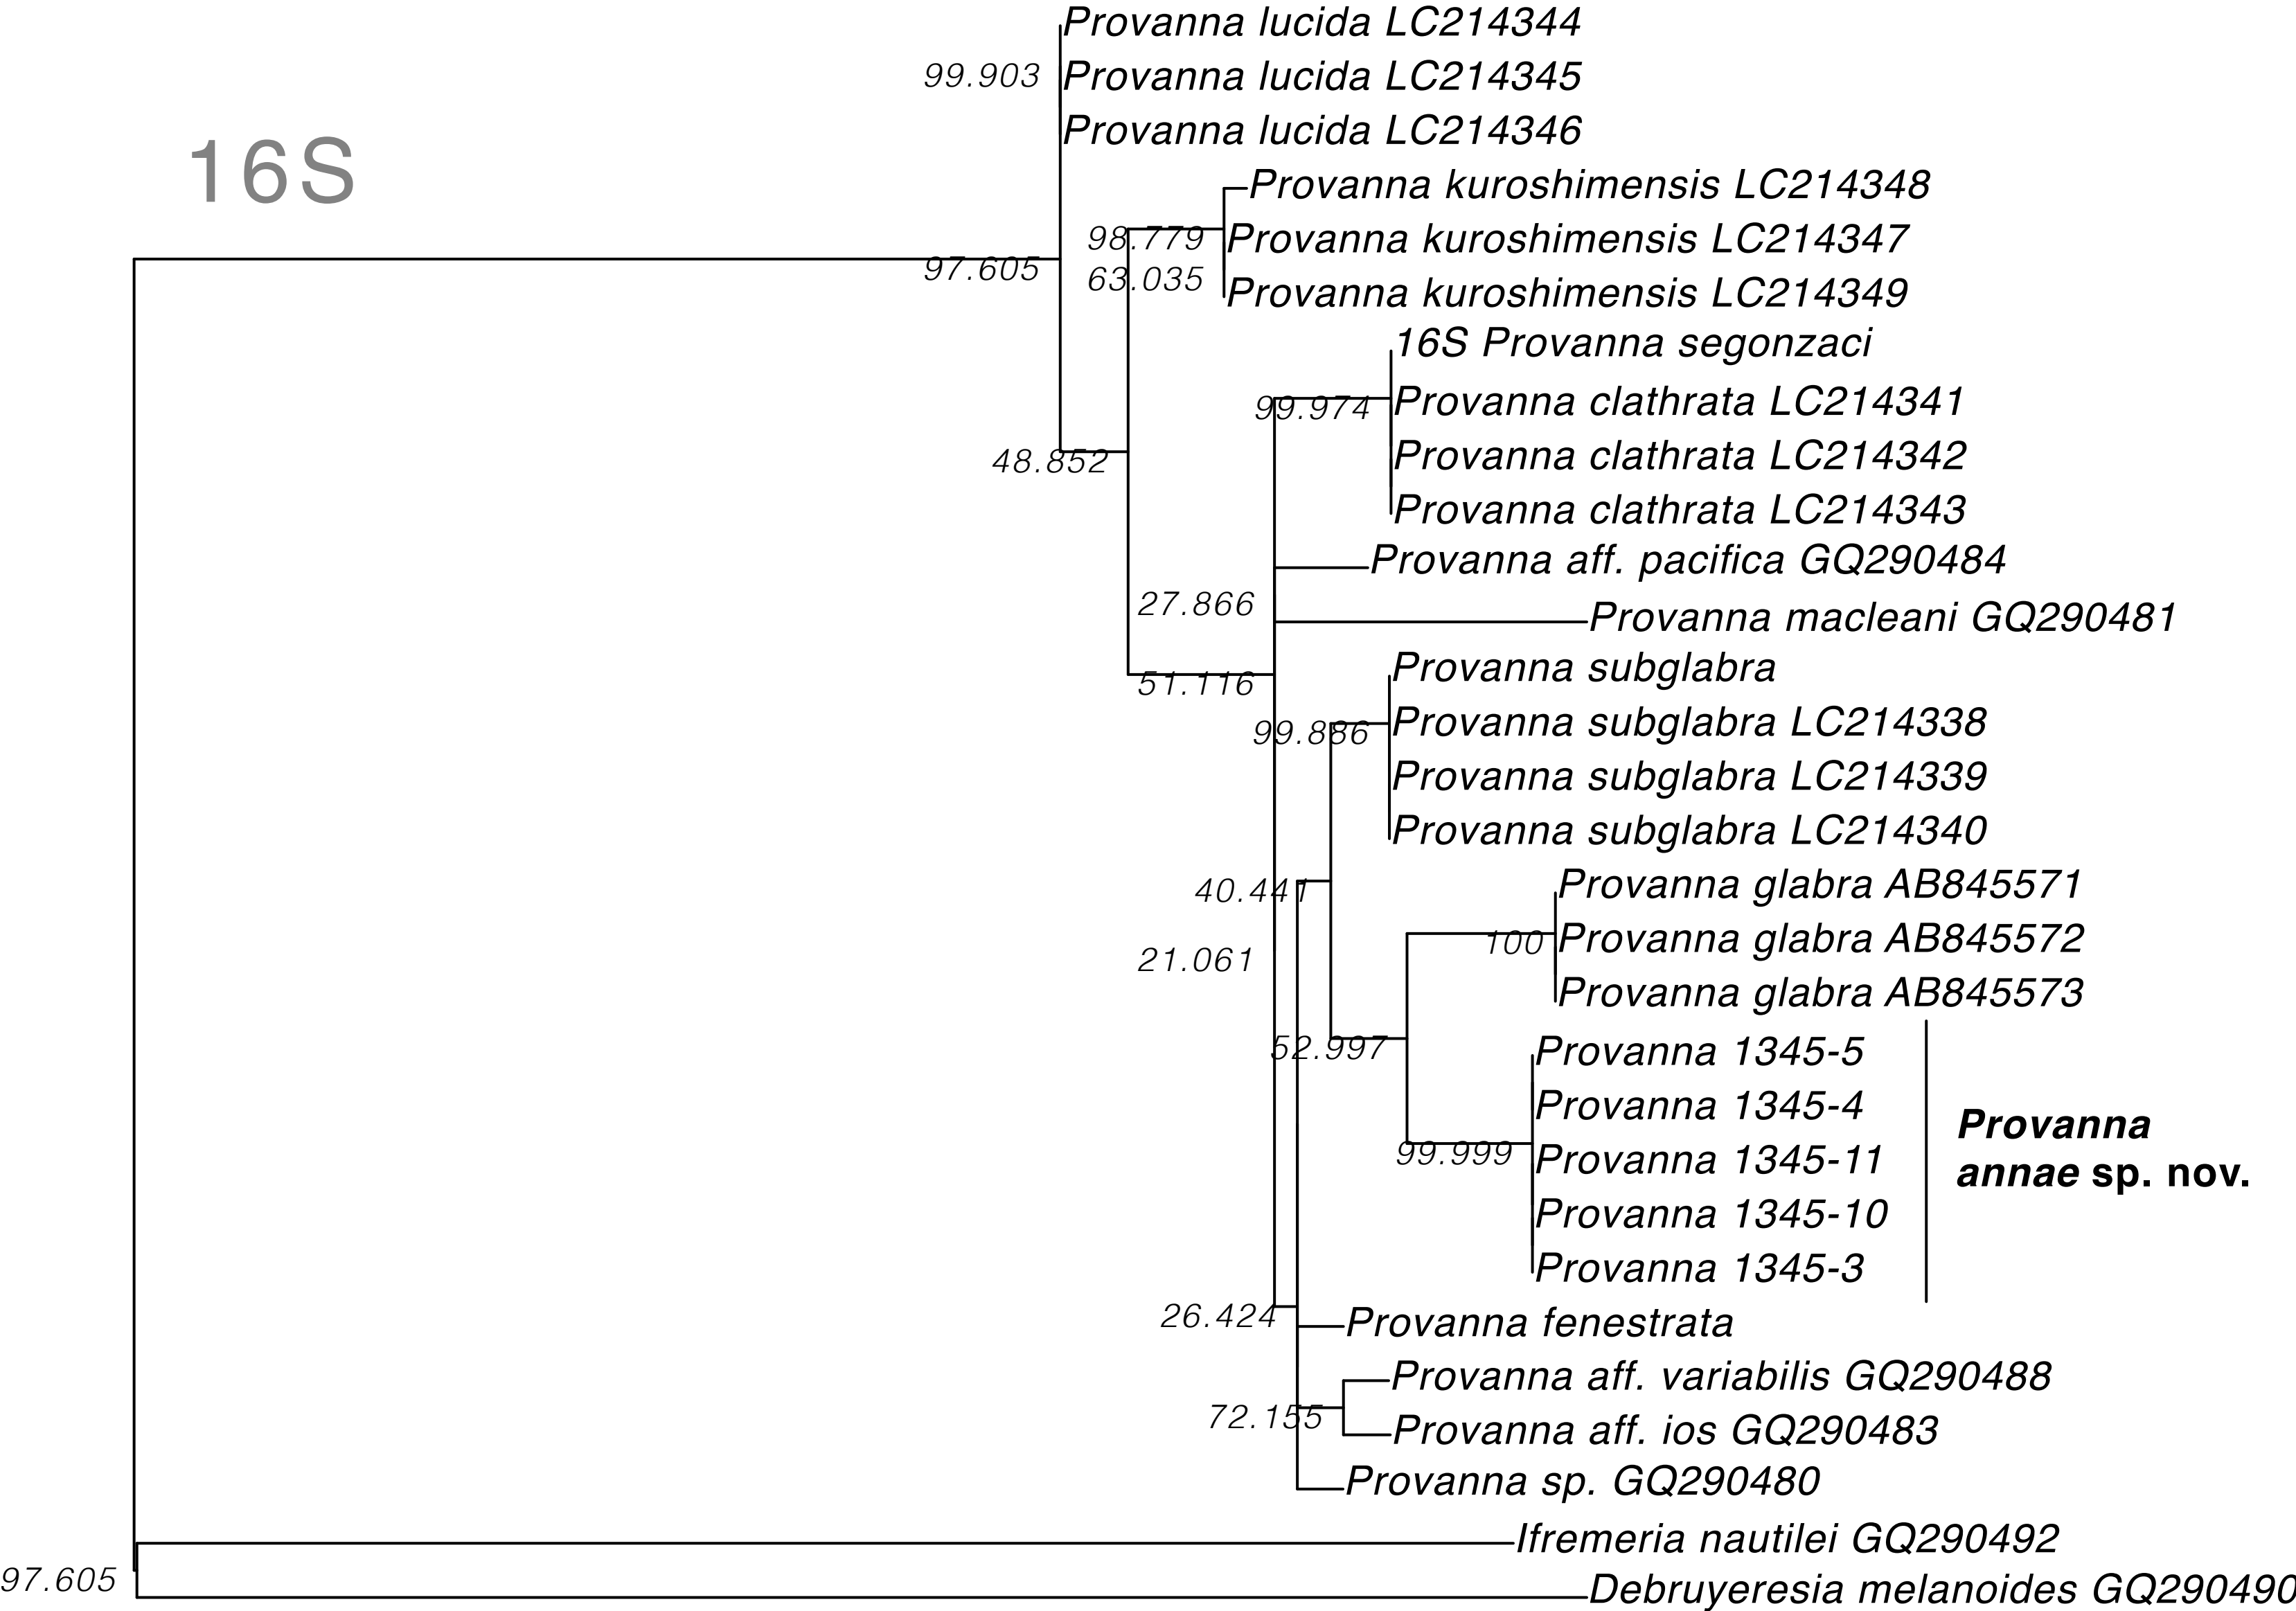

Supplement: s1 [file s1]
